# Supplementary material for: Influence on Soybean Aphid by the Tripartite Interaction between Soybean, a Rhizobium Bacterium, and an Arbuscular Mycorrhizal Fungus
Source: MDPI journal article supplement (doi:10.3390/microorganisms10061196), 2022-06-11
Supplement: s1 [file s1]

**Protocol S1:** steps of sterilization of soybean seeds that may contain *Bradyrhizobium* strains and other microorganisms (by Premier Tech)

1. in a small Corpak-type container (250 ml), put the seeds and add 95% ethanol;
2. turn the container 1-2 times to coat the seeds (do not shake) and leave for 30 seconds;
3. Drain the seeds in a colander and rinse the Corpak container with sterile water;
4. return the seeds to the Corpak and add a 3% peroxide solution (10 volumes);
5. turn the Corpak over 1-2 times to wet the seeds and leave for 10 minutes;
6. Drain the seeds in a colander and rinse the Corpak with water;
7. Return the seeds to the Corpak and add sterile water and turn the container 1-2 times to rinse the seeds thoroughly (final rinse).
8. Sow the seeds immediately.

**Table S1.** Correlation between plant nutrient contents (nitrogen, phosphorus, carbon) and aphid colony size, and plants variables (nodulation, AM fungus root colonization, shoot and root dry mass).

| Variables A             | Variables B        | Kendall <i>tau</i> coefficient | <i>p</i> |
|-------------------------|--------------------|--------------------------------|----------|
| Final aphid colony size | Nitrogen content   | 0.77                           | <0.0001  |
|                         | Phosphorus content | 0.40                           | 0.001    |
|                         | Carbon content     | 0.76                           | <0.0001  |
| Nodulation              | Nitrogen content   | 0.68                           | <0.0001  |
|                         | Phosphorus content | 0.30                           | 0.016    |
|                         | Carbon content     | 0.64                           | <0.0001  |
| AM fungus colonization  | Nitrogen content   | 0.37                           | 0.005    |
|                         | Phosphorus content | 0.42                           | 0.001    |
|                         | Carbon content     | 0.39                           | 0.003    |
| Shoot dry mass          | Nitrogen content   | 0.91                           | <0.0001  |
|                         | Phosphorus content | 0.49                           | <0.0001  |
|                         | Carbon content     | 0.99                           | <0.0001  |
| Root dry mass           | Nitrogen content   | 0.54                           | <0.0001  |
|                         | Phosphorus content | 0.40                           | 0.0009   |
|                         | Carbon content     | 0.56                           | <0.0001  |
